# Supplementary material
Source: MDPI journal article supplement (https://www.mdpi.com/2311-7524/7/2/14)
Supplement: s1 [file s1]

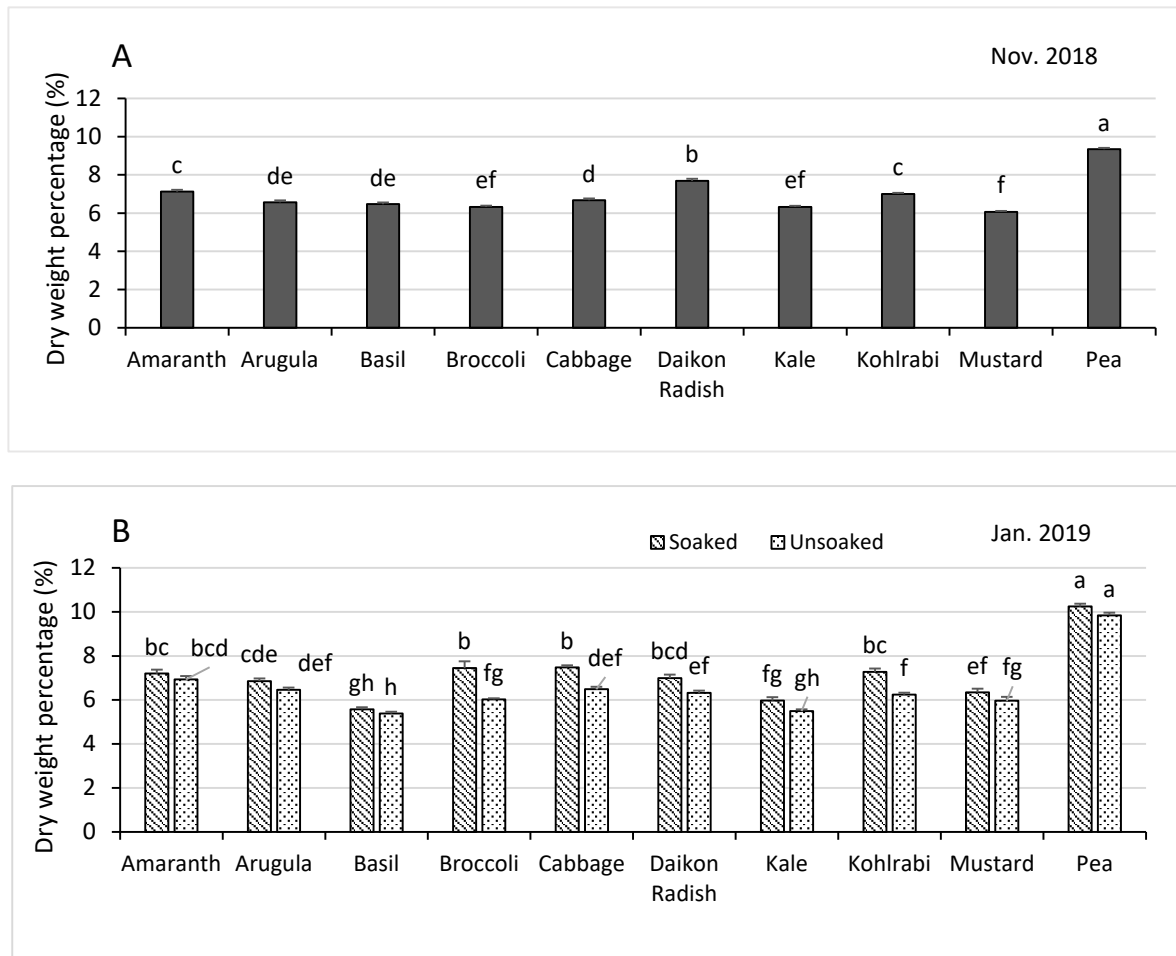

**Figure S1.** Dry weight percentage of ten microgreens affected by the main effect of species in November 2018 (A) or by the interaction between species and seed soaking in January 2019 (B). Means with standard error bars of each species were obtained by averaging data from both fertilization and pre-sowing seed treatments (A), or by averaging data from both fertilization treatments (B). Different lower case letters within a chart suggest significant difference among treatments indicated by Tukey's HSD test at  $\alpha \leq 0.05$ .

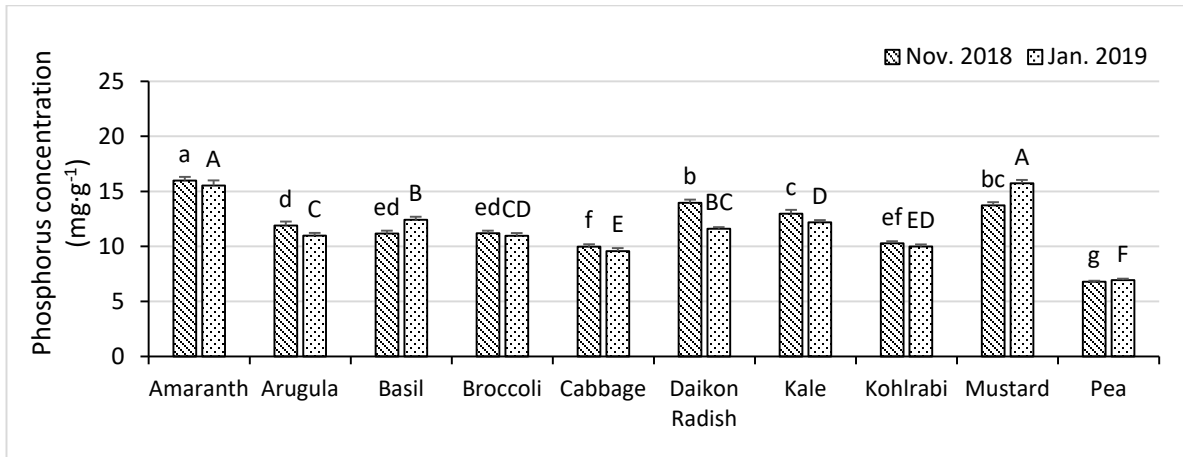

**Figure S2.** Phosphorus concentrations on a dry weight basis of ten species grown as microgreens. Means with standard error bars of each species were obtained by averaging data from both fertilization and pre-sowing seed treatments. Different lower case or capitalized letters suggest significant difference among species indicated by Tukey's HSD test at  $\alpha \leq 0.05$  in November 2018 or January 2019, respectively.

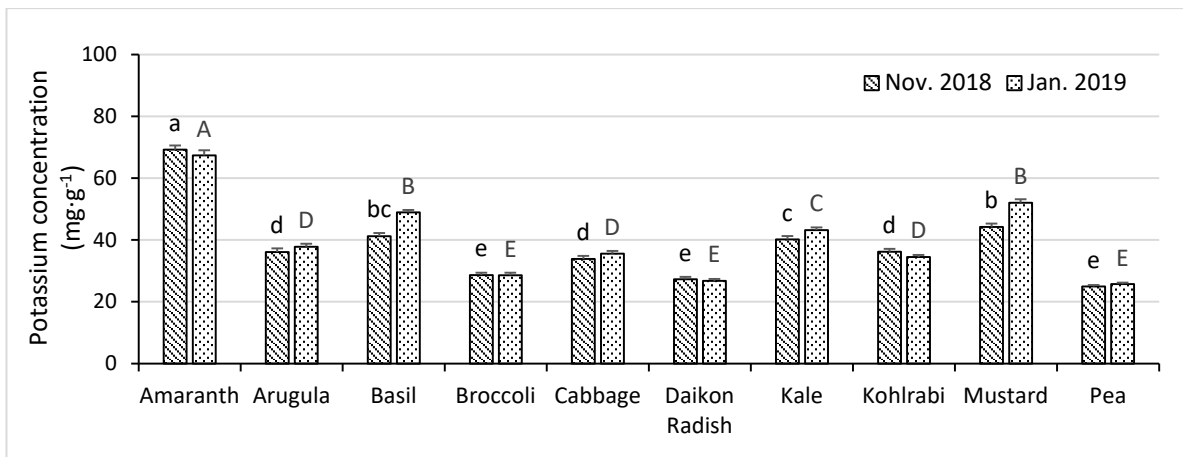

**Figure S3.** Potassium concentrations on a dry weight basis of ten species grown as microgreens. Means with standard error bars of each species were obtained by averaging data from both fertilization and pre-sowing seed treatments. Different lower case or capitalized letters suggest significant difference among species indicated by Tukey's HSD test at  $\alpha \leq 0.05$  in November 2018 or January 2019, respectively.

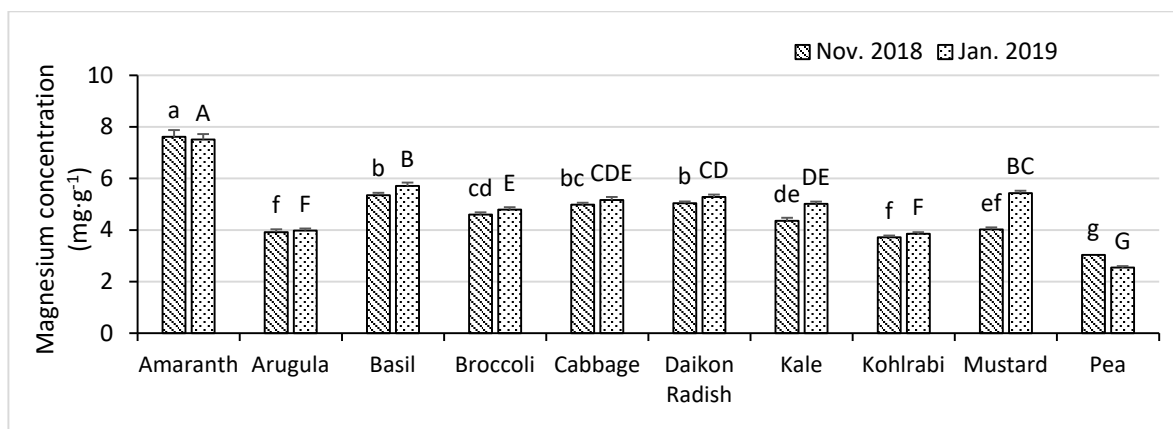

**Figure S4.** Magnesium concentrations on a dry weight basis of ten species grown as microgreens. Means with standard error bars of each species were obtained by averaging data from both fertilization and pre-sowing seed treatments. Different lower case or capitalized letters suggest significant difference among species indicated by Tukey's HSD test at  $\alpha \leq 0.05$  in November 2018 or January 2019, respectively.

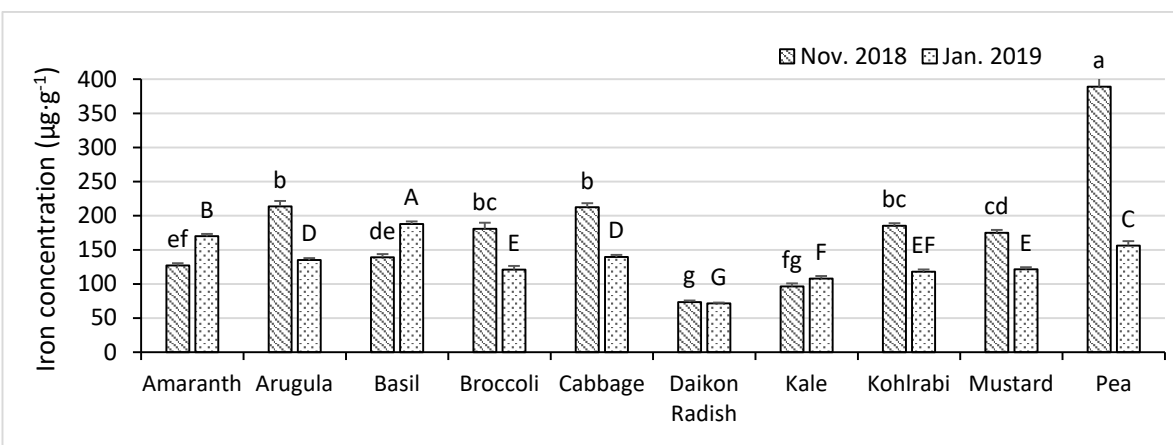

**Figure S5.** Iron concentrations on a dry weight basis of ten species grown as microgreens. Means with standard error bars of each species were obtained by averaging data from both fertilization and pre-sowing seed treatments. Different lower case or capitalized letters suggest significant difference among species indicated by Tukey's HSD test at  $\alpha \leq 0.05$  in November 2018 or January 2019, respectively.

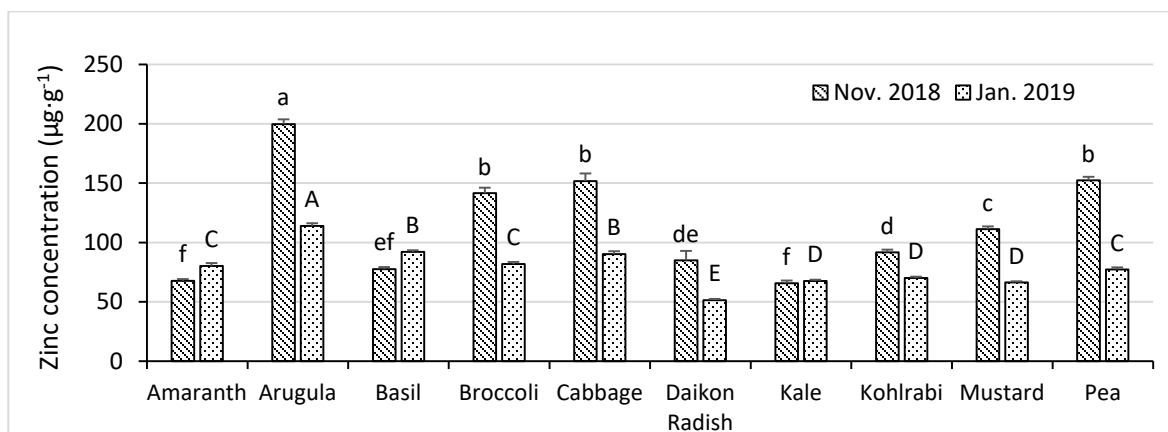

**Figure S6.** Zinc concentrations on a dry weight basis of ten species grown as microgreens. Means with standard error bars of each species were obtained by averaging data from both fertilization and pre-sowing seed treatments. Different lower case or capitalized letters suggest significant difference among species indicated by Tukey's HSD test at  $\alpha \leq 0.05$  in November 2018 or January 2019, respectively.
